# Supplementary material for: An Efficient Genome-Wide Fusion Partner Screening System for Secretion of Recombinant Proteins in Yeast
Source: PubMed Central journal article supplement (PMC4508530; doi:10.1038/srep12229), 2015-07-21
Supplement: srep12229-s1.pdf [file srep12229-s1.pdf]

## Supplementary Information

### **An Efficient Genome-Wide Fusion Partner Screening System for Secretion of Recombinant Proteins in Yeast**

Bae et al.

**Supplementary Table 1.** List of primers used in this study

| <b>Primer</b> | <b>Sequence</b>                                                    |
|---------------|--------------------------------------------------------------------|
| GAP-F         | CGAGCTCGGTACCCAAATTTTCCTATGAC                                      |
| GAP-R         | GAAAGCTTGCAAAAGCATTTTTGAATTCGTTTGTATGT                             |
| SIG-F         | GAATTCAAAAATGCTTTTGAAGCTTTC                                        |
| SIG-R         | GAGGCGGCCGCACGGCCGTAATGGCCAGCAGATATTTGGCTG                         |
| INV-F         | GGCCGTGCGGCCGCTCGGCCCTAGATAAAAAGGTCAATGACAAACGAAAC                 |
| INV-R         | AGTCGACTTACTATTTTACTTCCCTTACTTG                                    |
| HSA-F         | AGGCCATTACGGCCGTGATGCACACAAGAGTGAG                                 |
| HSA-R         | AGGCCGAGGCGCCAAGCCTAAGGCAGCTTGAC                                   |
| Gal10F        | TCGAGCTCATCGCTTCGCTGATTAATTAC                                      |
| GAL10R        | GGATCCTTGAATTTTCAAAAATTCTTAC                                       |
| Sfi-INV-F     | AGAATTCAAAAGGCCATTACGGCCGCGGCCGCTCGGCCCTAG                         |
| INV45-F       | GCGGCCGCTCGGCCCTCTGCTGGCCTCGCCTTAGATAAAAAGATTTAAATGACACCGTATGGGGTA |
| IL-F0         | ATTTTTGAAAATTCAAGGATCCGCACCTACTTCAAGTTCT                           |
| IL-F1         | ATTTTTGAAAATTCAAGGATCCTGCACCTACTTCAAGTTCT                          |
| IL-F2         | ATTTTTGAAAATTCAAGGATCCTTGCACCTACTTCAAGTTCT                         |
| IL2Ter        | AGTCGACTTAAGTTAGTGTGAGATG                                          |
| ASA24N6       | GCCAGCAGAGGCCGAGGCCAGNNNNN                                         |
| ASA24         | GCCAGCAGAGGCCGAGGCCAG                                              |
| KR-Target-F   | CTCGCCTTAGATAAAAAGA-Target sense sequence                          |
| Target-INV-R  | CATTGAACGCTTGTCAA-Target anti-sense sequence                       |
| KR-Inv-F      | TTGGACAAGCGTTCAATGACAAACGAACTAGCGATAG                              |
| INV300R       | GTATCATTGAAAAACCCACTCGTG                                           |
| GALSac-F      | CGAGCTCGGTACCCGGGGATCC                                             |
| T1KR-R        | GAACTGAAAGTAGGTGCCCTTTTATCTAGAGGATCAGATGAGAAGAC                    |
| KRIL-F        | TCTTCTCATCTGATCCTCTAGATAAAAAGGGCACCTACTTCAAGTTC                    |
| TFP1-1R       | AGAACCGAGAGCGCCGCGAGAG                                             |
| TFP1-2R       | TCTAGAGGTGCTATTGGTGTAAGAG                                          |

|          |                                                   |
|----------|---------------------------------------------------|
| TFPI-3R  | TCTAGAATCACCGCTAATTGTTGTG                         |
| ILSpe-F  | ACTAGTCTAGATAAAAAGGGCACC                          |
| TFPI-4-F | GGATCCATGTTCAATCGTTTTAAC                          |
| GAL40    | GTAAGAATTTTTGAAAATTC                              |
| LNKS-R   | TGTCACTCCGTTCAAGTCGACATTTAAATCTTTTATCTAAGGCGAG    |
| hGH-F    | CTCGCCTTAGATAAAAAGATTCCCAACCATTCCCTTA             |
| hGH-R    | CACTCCGTTCAAGTCGACCTAGAAGCCACAGCTGC               |
| KmEPG-F  | CTCGCCTTAGATAAAAAGATCTCCATTGGAAAAGAG              |
| KmEPG-R  | CACTCCGTTCAAGTCGACTTAACAGAAGGCTCCGC               |
| LNK40    | GGCCGCCTCGGCCTCTGCTGGCCTCGCCTTAGATAAAAAGA         |
| GT50R    | GTCATTATTAATATATATATATATATATTGTCACTCCGTTCAAGTCGAC |

---

6

7
